# Supplementary material for: Effects of a Mediterranean Diet Intervention on Maternal Stress, Well-Being, and Sleep Quality throughout Gestation—The IMPACT-BCN Trial
Source: MDPI journal article supplement (doi:10.3390/nu15102362), 2023-05-18
Supplement: s1 [file s1]

**Table S1.** Pregnancy and perinatal outcome of women included in the study (n=680).

| Characteristics                        | Usual<br>care    | Mediterranean diet | p value |
|----------------------------------------|------------------|--------------------|---------|
|                                        | n=349            | n=331              |         |
| Gestational age at recruitment (weeks) | 20.8 (0.7)       | 20.8 (0.6)         | 0.64    |
| <i>Pregnancy complications</i>         |                  |                    |         |
| Preeclampsia                           | 32 (9.2%)        | 19 (5.7%)          | 0.09    |
| Mild                                   | 26 (7.5%)        | 13 (3.9%)          | 0.05    |
| Severe                                 | 6 (1.7%)         | 6 (1.8%)           | 0.93    |
| Prenatally diagnosed SGA               | 31 (8.9%)        | 18 (5.4%)          | 0.08    |
| Threatened preterm labor               | 8 (2.3%)         | 11 (3.3%)          | 0.42    |
| Preterm premature rupture of membranes | 9 (2.6%)         | 8 (2.4%)           | 0.88    |
| Stillbirth                             | 1 (0.3%)         | 0 (0.0%)           | 0.33    |
| <i>Delivery outcome</i>                |                  |                    |         |
| Gestational age at delivery (weeks)    | 39.3 (1.9)       | 39.4 (1.8)         | 0.21    |
| Preterm birth                          | 20 (5.7%)        | 22 (6.6%)          | 0.63    |
| Induction of labor                     | 181 (52.0%)      | 163 (49.2%)        | 0.47    |
| Mode of delivery                       |                  |                    |         |
| Vaginal delivery                       | 204 (58.6%)      | 174 (52.6%)        | 0.11    |
| Cesarean section                       | 111 (31.9%)      | 122 (36.9%)        | 0.17    |
| Operative vaginal delivery             | 33 (9.5%)        | 35 (10.6%)         | 0.64    |
| Maternal anesthesia <sup>a</sup>       | 327 (94.2%)      | 309 (93.4%)        | 0.63    |
| Antibiotics during labor <sup>b</sup>  | 157 (45.2%)      | 166 (50.6%)        | 0.17    |
| Delivery complications <sup>c,d</sup>  | 20 (5.8%)        | 29 (8.9%)          | 0.12    |
| <i>Neonatal outcome</i>                |                  |                    |         |
| Female gender                          | 163 (46.8%)      | 165 (49.8%)        | 0.43    |
| Birthweight (g)                        | 3219 (2817-3501) | 3250 (2992-3520)   | 0.12    |
| Birthweight (percentile)               | 40.8 (30.4)      | 42.7 (29.1)        | 0.41    |
| Small for gestational age              | 75 (21.6%)       | 46 (13.9%)         | 0.01    |
| Severe SGA (<3 <sup>rd</sup> centile)  | 31 (8.9%)        | 15 (4.5%)          | 0.02    |

|                                  |           |           |      |
|----------------------------------|-----------|-----------|------|
| Apgar 5 minutes <7 <sup>e</sup>  | 1 (0.3%)  | 1 (0.3%)  | 0.10 |
| pH umbilical artery <sup>f</sup> | 7.2 (0.1) | 7.2 (0.1) | 0.25 |
| Neonatal resuscitation           | 17 (4.9%) | 12 (3.6%) | 0.42 |
| NICU admission                   | 22 (6.3%) | 18 (5.4%) | 0.63 |

PE: preeclampsia; SGA: small for gestational age; NICU: Neonatal intensive care unit.

Data are expressed as median (IQR) or mean (SD) or n (%).

<sup>a</sup>Data available for 678 pregnancies.

<sup>b</sup>Data available for 675 pregnancies.

<sup>c</sup>Data available for 674 pregnancies.

<sup>d</sup>Placental abruptio, shoulder dystocia, postpartum hemorrhage, postpartum infection

<sup>e</sup>Data available for 664 pregnancies.

<sup>f</sup>Data available for 459 pregnancies.

**Table S2.** Changes in dietary key-foods intake and Mediterranean diet adherence evaluated at baseline and final visits according to intervention groups.

|                              |                       | <b>Mediterranean diet</b> | <b>Usual Care</b> |                      | <b>Mediterranean diet vs. Usual care</b> |
|------------------------------|-----------------------|---------------------------|-------------------|----------------------|------------------------------------------|
|                              |                       |                           |                   | <i>P<sup>c</sup></i> | <i>Difference (95% CI)</i>               |
| Extra virgin olive oil – g/d | Baseline <sup>a</sup> | 34.9 (18.7)               | 32.5 (19.4)       |                      |                                          |
|                              | Final <sup>b</sup>    | 42.6 (0.96)**             | 39.3 (0.88)**     | 0.011                | 3.34 (0.78 to 5.90)                      |
| Refined olive oil – g/d      | Baseline <sup>a</sup> | 7.09 (13.7)               | 7.94 (15.2)       |                      |                                          |
|                              | Final <sup>b</sup>    | 2.98 (0.70)**             | 5.56 (0.64)*      | 0.007                | -2.57 (-4.43 to -0.72)                   |
| Total nuts – g/d             | Baseline <sup>a</sup> | 21.0 (21.2)               | 17.8 (18.0)       |                      |                                          |
|                              | Final <sup>b</sup>    | 27.5 (1.16)**             | 23.2 (1.05)**     | 0.006                | 4.30 (1.23 to 7.38)                      |
| Vegetables – g/d             | Baseline <sup>a</sup> | 289.8 (129.8)             | 286.5 (127.8)     |                      |                                          |

|                                  |                       |                |                |        |                        |
|----------------------------------|-----------------------|----------------|----------------|--------|------------------------|
|                                  | Final <sup>b</sup>    | 321.1 (6.40)** | 298.4 (5.80)   | 0.008  | 22.8 (5.83 to 39.7)    |
| Legumes – g/d                    | Baseline <sup>a</sup> | 52.7 (41.8)    | 50.8 (34.8)    |        |                        |
|                                  | Final <sup>b</sup>    | 68.4 (2.76)**  | 63.4 (2.50)**  | 0.173  | 5.06 (-2.23 to 12.4)   |
| Fruits – g/d                     | Baseline <sup>a</sup> | 326.2 (169.9)  | 318.0 (162.2)  |        |                        |
|                                  | Final <sup>b</sup>    | 372.2 (11.2)** | 340.8 (10.2)   | 0.039  | 31.3 (1.65 to 61.1)    |
| Refined cereals – g/d            | Baseline <sup>a</sup> | 62.6 (47.3)    | 63.6 (42.1)    |        |                        |
|                                  | Final <sup>b</sup>    | 37.7 (2.26)**  | 51.2 (2.07)**  | <0.001 | -13.5 (-19.5 to -7.45) |
| Whole grain cereals – g/d        | Baseline <sup>a</sup> | 41.9 (44.0)    | 35.4 (36.8)    |        |                        |
|                                  | Final <sup>b</sup>    | 55.7 (2.34)**  | 46.4 (2.12)**  | 0.003  | 9.36 (3.15 to 15.6)    |
| Fish or seafood – g/d            | Baseline <sup>a</sup> | 72.0 (42.2)    | 72.4 (43.3)    |        |                        |
|                                  | Final <sup>b</sup>    | 89.6 (2.51)**  | 78.8 (2.89)*   | 0.001  | 10.9 (4.23 to 17.5)    |
| Fat fish – g/d                   | Baseline <sup>a</sup> | 14.9 (16.4)    | 15.3 (16.1)    |        |                        |
|                                  | Final <sup>b</sup>    | 26.9 (1.20)**  | 19.7 (1.09)**  | <0.001 | 7.19 (4.01 to 10.4)    |
| Lean meat – g/d                  | Baseline <sup>a</sup> | 71.3 (38.5)    | 68.9 (37.1)    |        |                        |
|                                  | Final <sup>b</sup>    | 77.8 (2.4)**   | 72.2 (1.87)    | 0.043  | 5.61 (0.18 to 11.0)    |
| Red meat – g/d                   | Baseline <sup>a</sup> | 46.5 (35.0)    | 50.2 (36.7)    |        |                        |
|                                  | Final <sup>b</sup>    | 42.0 (1.76)*   | 46.2 (1.61)    | 0.079  | -4.19 (-8.87 to 0.48)  |
| Processed meat – g/d             | Baseline <sup>a</sup> | 32.0 (27.6)    | 33.6 (26.1)    |        |                        |
|                                  | Final <sup>b</sup>    | 31.7 (1.20)    | 30.0 (1.09)*   | 0.299  | 1.69 (-1.50 to 4.87)   |
| Pastries, cakes, or sweets – g/d | Baseline <sup>a</sup> | 38.0 (32.9)    | 42.5 (37.5)    |        |                        |
|                                  | Final <sup>b</sup>    | 33.2 (1.86)*   | 35.7 (1.68)**  | 0.315  | -2.52 (-7.44 to 2.39)  |
| Dairy products – g/d             | Baseline <sup>a</sup> | 337.5 (214.7)  | 322.6 (198.5)  |        |                        |
|                                  | Final <sup>b</sup>    | 431.5 (13.0)** | 397.6 (11.7)** | 0.053  | 33.9 (-0.38 to 68.2)   |
| Mediterranean diet score         | Baseline <sup>a</sup> | 7.97 (2.50)    | 7.46 (2.62)    |        |                        |
|                                  | Final <sup>b</sup>    | 12.1 (0.12)**  | 7.86 (0.12)*   | <0.001 | 4.26 (3.92 to 4.60)    |

<sup>a</sup>Baseline values are observed means (SD). <sup>b</sup>Final values are baseline-adjusted (least-squares) means (SE) and comparison among groups done with ANCOVA analysis. \*P<0.05 and \*\*P<0.001 final from baseline comparison.  
<sup>c</sup>ANCOVA analysis.

**Table S3.** Changes in nutrients intake and Mediterranean diet adherence evaluated at baseline and final visits according to intervention groups.

|                       |                       | <b>Mediterranean diet</b> | <b>Usual Care</b> |                      | <b>Mediterranean diet<br/>vs.<br/>Usual care</b> |
|-----------------------|-----------------------|---------------------------|-------------------|----------------------|--------------------------------------------------|
|                       |                       |                           |                   | <i>P<sup>c</sup></i> | <i>Difference<br/>(95% CI)</i>                   |
| Energy – kcal/d       | Baseline <sup>a</sup> | 2468 (520.8)              | 2420 (509.1)      |                      |                                                  |
|                       | Final <sup>b</sup>    | 2526 (27.4)*              | 2502 (24.9)*      | 0.517                | 24.0 (-48.6 to 96.6)                             |
| Protein – kcal/d      | Baseline <sup>a</sup> | 103.9 (25.4)              | 102.7 (26.2)      |                      |                                                  |
|                       | Final <sup>b</sup>    | 113.6 (1.47)**            | 108.2 (1.33)**    | 0.007                | 5.36 (1.47 to 9.24)                              |
| Carbohydrate – g/d    | Baseline <sup>a</sup> | 222.9 (62.1)              | 216.0 (58.1)      |                      |                                                  |
|                       | Final <sup>b</sup>    | 214.5 (3.01)              | 217.0 (2.74)      | 0.545                | -2.47 (-10.4 to 5.52)                            |
| Fiber – g/d           | Baseline <sup>a</sup> | 33.8 (11.1)               | 32.9 (10.8)       |                      |                                                  |
|                       | Final <sup>b</sup>    | 36.4 (0.59)**             | 34.8 (0.54)*      | 0.054                | 1.55 (-0.02 to 3.12)                             |
| Total fat – g/d       | Baseline <sup>a</sup> | 128.8 (30.6)              | 127.0 (30.0)      |                      |                                                  |
|                       | Final <sup>b</sup>    | 134.8 (1.65)**            | 133.4 (1.51)**    | 0.530                | 1.41 (-2.98 to 5.79)                             |
| SFA – g/d             | Baseline <sup>a</sup> | 34.7 (10.3)               | 34.5 (9.41)       |                      |                                                  |
|                       | Final <sup>b</sup>    | 35.1 (0.53)               | 35.8 (0.48)*      | 0.343                | -0.68 (-2.08 to 0.73)                            |
| MUFA – g/d            | Baseline <sup>a</sup> | 61.9 (15.0)               | 61.2 (15.2)       |                      |                                                  |
|                       | Final <sup>b</sup>    | 64.3 (0.81)*              | 63.9 (0.73)*      | 0.685                | 0.44 (-1.69 to 2.58)                             |
| PUFA – g/d            | Baseline <sup>a</sup> | 22.7 (8.38)               | 22.0 (7.81)*      |                      |                                                  |
|                       | Final <sup>b</sup>    | 25.3 (0.48)**             | 23.8 (0.44)*      | 0.018                | 1.53 (0.26 to 2.80)                              |
| α-Linoleic acid – g/d | Baseline <sup>a</sup> | 14.8 (6.33)               | 14.5 (5.74)       |                      |                                                  |

|                                |                       |               |               |        |                        |
|--------------------------------|-----------------------|---------------|---------------|--------|------------------------|
|                                | Final <sup>b</sup>    | 16.6 (0.36)** | 15.7 (0.33)*  | 0.090  | 0.83 (-0.13 to 1.78)   |
| $\alpha$ -Linolenic acid – g/d | Baseline <sup>a</sup> | 1.43 (0.65)   | 1.38 (0.60)   |        |                        |
|                                | Final <sup>b</sup>    | 1.96 (0.05)** | 1.59 (0.04)** | <0.001 | 0.37 (0.25 to 0.50)    |
| EPA – g/d                      | Baseline <sup>a</sup> | 0.16 (0.11)   | 0.16 (0.11)   |        |                        |
|                                | Final <sup>b</sup>    | 0.23 (0.01)** | 0.18 (0.01)** | <0.001 | 0.04 (0.02 to 0.06)    |
| DHA – g/d                      | Baseline <sup>a</sup> | 0.32 (0.25)   | 0.33 (0.26)   |        |                        |
|                                | Final <sup>b</sup>    | 0.50 (0.02)** | 0.39 (0.02)** | <0.001 | 0.10 (0.06 to 0.15)    |
| <i>Trans</i> -FA – g/d         | Baseline <sup>a</sup> | 1.66 (1.22)   | 1.66 (1.13)   |        |                        |
|                                | Final <sup>b</sup>    | 1.31 (0.06)** | 1.55 (0.05)   | 0.003  | -0.24 (-0.40 to -0.08) |
| Cholesterol – mg/d             | Baseline <sup>a</sup> | 311.8 (98.8)  | 332.0 (101.4) |        |                        |
|                                | Final <sup>b</sup>    | 344.1 (5.25)* | 332.8 (4.78)  | 0.111  | 11.3 (-2.60 to 25.2)   |

<sup>a</sup>Baseline values are observed means (SD). <sup>b</sup>Final values are baseline-adjusted (least-squares) means (SE) and comparison among groups done with ANCOVA analysis. \*P<0.05 and \*\*P<0.001 final from baseline comparison.

<sup>c</sup>ANCOVA analysis.
